# Supplementary material for: Neat plasma proteomics: getting the best out of the worst
Source: PubMed Central journal article supplement (PMC10935919; doi:10.1186/s12014-024-09477-6), 2024-03-12
Supplement: 12014_2024_9477_MOESM1_ESM.pdf [file 12014_2024_9477_MOESM1_ESM.pdf]

|                                                | <b>Classic<br/>100SPD</b>                                       | <b>Classic<br/>60SPD</b>                                        | <b>Whisper<br/>40SPD</b>                                         | <b>48SPD</b>                                           | <b>24SPD</b>                                           |
|------------------------------------------------|-----------------------------------------------------------------|-----------------------------------------------------------------|------------------------------------------------------------------|--------------------------------------------------------|--------------------------------------------------------|
| <b>LC system</b>                               | Evosep                                                          | Evosep                                                          | Evosep                                                           | nElute                                                 | nElute                                                 |
| <b>column</b>                                  | 8 cm<br>performance<br><br>EV1109<br>(8cm x<br>150µm,<br>1.5µm) | 8 cm<br>performance<br><br>EV1109<br>(8cm x<br>150µm,<br>1.5µm) | IonOpticks<br>Aurora Elite<br><br>(15cm x<br>75µm, C18<br>1.7µm) | IonOpticks Aurora<br><br>(25cmx75µm, C18<br>1.6µm)     | IonOpticks Aurora<br><br>(25cmx75µm, C18<br>1.6µm)     |
| <b>Flow rate</b>                               | 1500nL/min                                                      | 1000nL/min                                                      | 100nL/min                                                        | 400nL/min                                              | 200nL/min                                              |
| <b>Active gradient</b>                         | 11.5min                                                         | 21min                                                           | 31min                                                            | 12min                                                  | 30min                                                  |
| <b>Total gradient</b>                          | 14.4min                                                         | 24min                                                           | 38min                                                            | 15min                                                  | 40min                                                  |
| <b>Column Equilibration<br/>time estimated</b> | 2.9min at<br>2000nL/min                                         | 3min at<br>2000nL/min                                           | 8min at<br>450nL/min                                             | 5min<br>(requilibration)+1<br>6min (sample<br>loading) | 5min<br>(requilibration)+1<br>6min (sample<br>loading) |
| <b>Sample turnover</b>                         | 14.4min                                                         | 24min                                                           | 38min                                                            | 36min                                                  | 61min                                                  |
