# Supplementary material for: Neat plasma proteomics: getting the best out of the worst
Source: PubMed Central journal article supplement (PMC10935919; doi:10.1186/s12014-024-09477-6), 2024-03-12
Supplement: 12014_2024_9477_MOESM2_ESM.pdf [file 12014_2024_9477_MOESM2_ESM.pdf]

| <b>Filters applied</b> | <b>Definition</b>                                                                                                                                                     |
|------------------------|-----------------------------------------------------------------------------------------------------------------------------------------------------------------------|
| Q.Value                | Run-specific precursor q-value                                                                                                                                        |
| Lib.Q.Value            | q-value for the respective library entry, 'global' if the library was created by DIA-NN. In case of MBR, this applies to the library created after the first MBR pass |
| Lib.PG.Q.Value         | only relevant for MBR: global q-value for the protein group calculated after the first MBR pass                                                                       |
| PG.Q.Value             | run-specific q-value for the protein group                                                                                                                            |
