# Supplementary material for: Neat plasma proteomics: getting the best out of the worst
Source: PubMed Central journal article supplement (PMC10935919; doi:10.1186/s12014-024-09477-6), 2024-03-12

**A**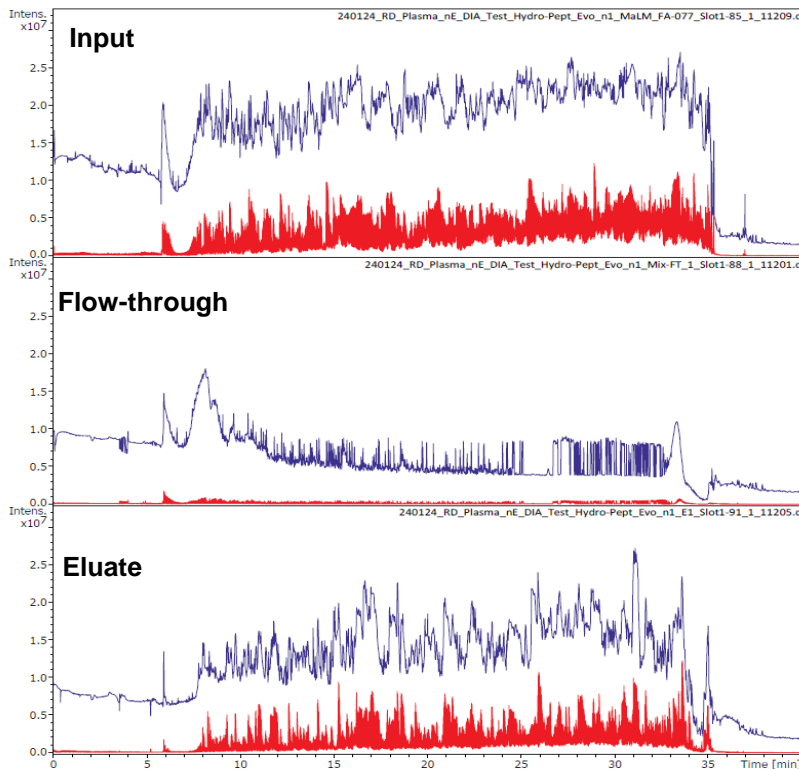**B**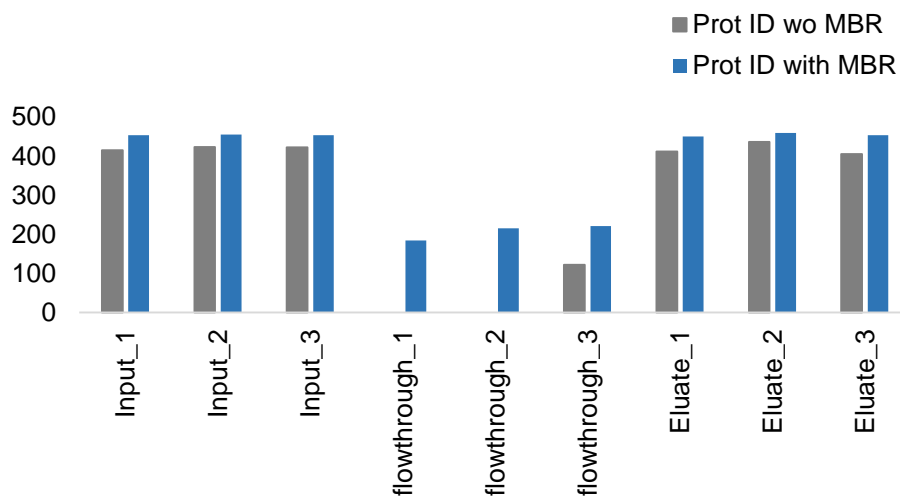**C**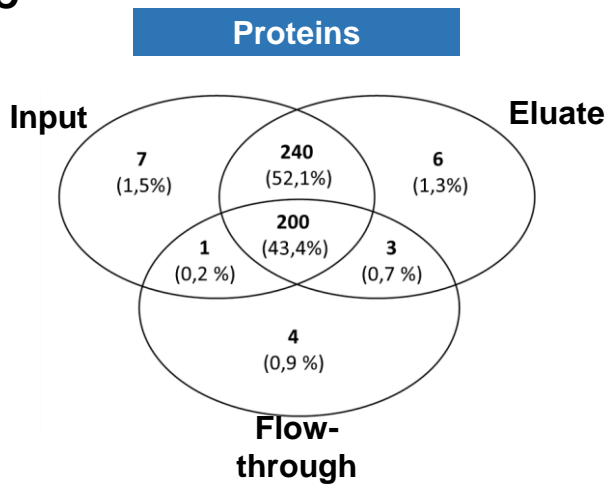**D**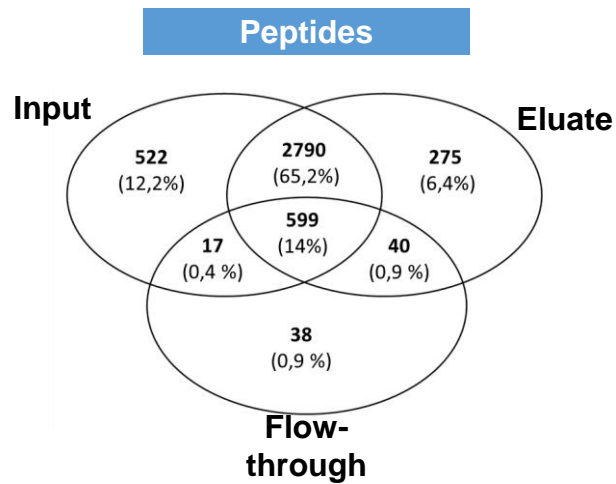

Supplement: 12014_2024_9477_MOESM5_ESM.pdf [file 12014_2024_9477_MOESM5_ESM.pdf]
